# Supplementary material for: Models of Self-Peptide Sampling by Developing T Cells Identify Candidate Mechanisms of Thymic Selection
Source: PubMed Central journal article supplement (PMC3723501; doi:10.1371/journal.pcbi.1003102), 2013-07-25
Supplement: pcbi.1003102.s004.pdf [file pcbi.1003102.s004.pdf]

Table S1

| $n$   | $q$   | $p$            | $k_{TIM}$            | $k_2$                | $k_3$                | $t_{max}$               | $\log_{10}(B)$    | $C$        |
|-------|-------|----------------|----------------------|----------------------|----------------------|-------------------------|-------------------|------------|
| 500   | 0.001 | 465 (450, 540) | 94.19 (80.24, 98.21) | 99.76 (99.75, 99.77) | 99.76 (99.75, 99.77) | 0.0006 (0.0003, 0.001)  | -3.1 (-3.5, -3)   | 5.0 (5, 5) |
| 500   | 0.01  | 94 (35, 190)   | 93.59 (40.85, 98.91) | 99.88 (99.67, 99.95) | 99.88 (99.67, 99.95) | 0.0986 (0.0032, 0.3162) | -3.4 (-3.5, -3)   | 5.4 (4, 7) |
| 500   | 0.1   | 13 (9, 16)     | 94.69 (80.18, 98.96) | 99.75 (99.61, 99.82) | 99.75 (99.62, 99.82) | 0.2214 (0.0316, 0.3162) | -3.3 (-3.5, -3)   | 5.7 (5, 7) |
| 500   | 0.5   | 3 (2, 6)       | 99.63 (96.5, 99.92)  | 99.8 (99.6, 99.92)   | 99.8 (99.6, 99.92)   | 0.1116 (0.01, 0.3162)   | -2.9 (-3.5, -2.5) | 5.2 (5, 6) |
| 500   | 0.9   | 3 (2, 3)       | 99.73 (99.57, 99.91) | 99.66 (99.47, 99.71) | 99.66 (99.47, 99.71) | 0.0829 (0.0316, 0.1)    | -2.9 (-3, -2.5)   | 5.0 (4, 6) |
| 500   | 1     | 3 (3, 4)       | 99.6 (99.38, 99.81)  | 99.74 (99.74, 99.74) | 99.74 (99.74, 99.74) | 0.1000 (0.0562, 0.12)   | -3.0 (-3, -3)     | 5.0 (4, 6) |
| 1000  | 0.001 | 586 (350, 880) | 75.47 (65.31, 86.28) | 99.9 (99.83, 99.94)  | 99.9 (99.83, 99.94)  | 0.0080 (0.0032, 0.01)   | -3.7 (-3.7, -3.7) | 4.4 (4, 5) |
| 1000  | 0.01  | 54 (20, 90)    | 99.12 (84.89, 99.61) | 99.88 (99.68, 99.94) | 99.88 (99.69, 99.94) | 0.0072 (0.0032, 0.0316) | -3.0 (-3.7, -2.7) | 5.1 (4, 6) |
| 1000  | 0.1   | 9 (4, 21)      | 99.71 (82.42, 99.93) | 99.93 (99.84, 99.98) | 99.93 (99.84, 99.98) | 0.0395 (0.0032, 0.3162) | -2.9 (-3.7, -2.7) | 5.4 (4, 6) |
| 1000  | 0.5   | 3 (2, 5)       | 99.85 (99.15, 99.97) | 99.88 (99.8, 99.94)  | 99.88 (99.8, 99.94)  | 0.0527 (0.0032, 0.1)    | -2.9 (-3.2, -2.7) | 5.4 (4, 6) |
| 1000  | 0.9   | 3 (2, 3)       | 99.92 (99.69, 99.97) | 99.8 (99.73, 99.84)  | 99.8 (99.73, 99.84)  | 0.0440 (0.0032, 0.1)    | -2.8 (-3.2, -2.7) | 5.6 (5, 6) |
| 1000  | 1     | 3 (3, 4)       | 99.87 (99.71, 99.97) | 99.71 (99.7, 99.81)  | 99.71 (99.7, 99.81)  | 0.0505 (0.004, 0.1)     | -2.9 (-3.2, -2.6) | 5.2 (4, 6) |
| 10000 | 0.001 | 450 (350, 650) | 87.7 (84.28, 93.13)  | 99.98 (99.98, 99.99) | 99.98 (99.98, 99.99) | 0.0083 (0.0032, 0.01)   | -3.7 (-3.7, -3.7) | 5.8 (5, 6) |
| 10000 | 0.01  | 51 (20, 130)   | 98.99 (77.48, 99.73) | 99.98 (99.97, 99.99) | 99.98 (99.97, 99.99) | 0.0188 (0.0032, 0.1)    | -3.5 (-3.7, -3)   | 4.9 (4, 6) |
| 10000 | 0.1   | 5 (3, 15)      | 98.06 (75.9, 98.65)  | 99.99 (99.97, 100)   | 99.99 (99.97, 100)   | 0.0251 (0.01, 0.1778)   | -3.1 (-3.7, 2.5)  | 5.2 (4, 6) |
| 10000 | 0.5   | 4 (2, 10)      | 99.94 (97.31, 99.99) | 99.98 (99.96, 99.99) | 99.98 (99.96, 99.99) | 0.0460 (0.0032, 0.3162) | -3.1 (-3.5, -2.7) | 5.0 (4, 6) |
| 10000 | 0.9   | 3 (2, 5)       | 99.97 (99.57, 99.99) | 99.98 (99.97, 99.99) | 99.98 (99.97, 99.99) | 0.0322 (0.0032, 0.1)    | -3.0 (-3.5, -2.7) | 5.2 (4, 6) |
| 10000 | 1     | 3 (2, 5)       | 99.98 (99.59, 99.99) | 99.98 (99.98, 99.99) | 99.98 (99.98, 99.99) | 0.0251 (0.001, 0.1)     | -2.8 (-3.5, -2.5) | 5.1 (4, 6) |
