# Supplementary material for: Models of Self-Peptide Sampling by Developing T Cells Identify Candidate Mechanisms of Thymic Selection
Source: PubMed Central journal article supplement (PMC3723501; doi:10.1371/journal.pcbi.1003102), 2013-07-25
Supplement: pcbi.1003102.s006.pdf [file pcbi.1003102.s006.pdf]

## Text S2: The Two Phase Model

We propose that an interaction with agonist peptide present at frequency  $t$  triggers  $T_{\text{reg}}$  development during Phase A but deletion in Phase B, when the same peptide is capable of inducing a stronger downstream TCR signal. The adjusted probabilities of a TCR-pMHC encounter within the four selecting regions are  $((1 - t)\alpha_1, (1 - t)\alpha_2, (1 - t)\alpha_3 + t, (1 - t)\alpha_4)$  in phase A, and  $((1 - t)\beta_1, (1 - t)\beta_2, (1 - t)\beta_3, (1 - t)\beta_4 + t)$  in phase B. Each cell has up to  $n_A$  and  $n_B$  encounters in the respective phases.

The probabilities of selection into each lineage as a function of agonist frequency  $t$  are then

$$\begin{aligned}
 P[T_{\text{conv}}(t)] &= (1 - t)^{n_A + n_B} (\alpha_1 + \alpha_2)^{n_A} (\beta_1 + \beta_2)^{n_B} - (1 - t)^{n_A + n_B} \alpha_1^{n_A} \beta_1^{n_B} \\
 P[T_{\text{reg}}(t)] &= [(1 - t)(1 - \alpha_4) + t]^{n_A} (1 - t)^{n_B} (1 - \beta_4)^{n_B} \\
 &\quad - (1 - t)^{n_A + n_B} (\alpha_1 + \alpha_2)^{n_A} (\beta_1 + \beta_2)^{n_B} \\
 &= ((1 - t)^{n_A} (1 - \alpha_4)^{n_A} + [(1 - t)(1 - \alpha_4) + t]^{n_A} - (1 - t)^{n_A} (1 - \alpha_4)^{n_A}) \\
 &\quad \times (1 - t)^{n_B} (1 - \beta_4)^{n_B} - (1 - t)^{n_A + n_B} (\alpha_1 + \alpha_2)^{n_A} (\beta_1 + \beta_2)^{n_B}, \\
 &= (1 - t)^{n_A + n_B} (1 - \alpha_4)^{n_A} (1 - \beta_4)^{n_B} - (1 - t)^{n_A + n_B} (\alpha_1 + \alpha_2)^{n_A} (\beta_1 + \beta_2)^{n_B} \\
 &\quad + (1 - t)^{n_B} (1 - \alpha_4)^{n_A} (1 - \beta_4)^{n_B} \left[ \left(1 - t + \frac{t}{1 - \alpha_4}\right)^{n_A} - (1 - t)^{n_A} \right].
 \end{aligned}$$

By definition,

$$P[T_{\text{conv}}(\text{WT})] = (\alpha_1 + \alpha_2)^{n_A} (\beta_1 + \beta_2)^{n_B} - \alpha_1^{n_A} \beta_1^{n_B}, \quad (\text{S2-1})$$

$$P[T_{\text{reg}}(\text{WT})] = (1 - \alpha_4)^{n_A} (1 - \beta_4)^{n_B} - (\alpha_1 + \alpha_2)^{n_A} (\beta_1 + \beta_2)^{n_B} \quad (\text{S2-2})$$

and if we assume that failure to positively select is negligible for  $\text{AND}^+$  T cells (*i.e.*  $\alpha_1^{n_A} \beta_1^{n_B} \ll 1$ ), then  $(1 - \alpha_4)^{n_A} (1 - \beta_4)^{n_B} \approx P[T_{\text{conv}}(\text{WT})] + P[T_{\text{reg}}(\text{WT})]$ . Thus six unknown parameters  $\beta_{1,2,3}$  and  $\alpha_{1,2,3}$  are removed from the calculation, and the model becomes:

$$\begin{aligned}
 P[T_{\text{conv}}(t)] &= (1 - t)^{n_A + n_B} P[T_{\text{conv}}(\text{WT})] \\
 P[T_{\text{reg}}(t)] &= (1 - t)^{n_A + n_B} P[T_{\text{reg}}(\text{WT})] + \\
 &\quad (1 - t)^{n_B} (P[T_{\text{conv}}(\text{WT})] + P[T_{\text{reg}}(\text{WT})]) \left[ \left(1 - t + \frac{t}{1 - \alpha_4}\right)^{n_A} - (1 - t)^{n_A} \right].
 \end{aligned}$$

So we obtain a prediction for conventional and regulatory T cell numbers as a function of agonist frequency, number of interactions in each phase, the probability of encountering a negatively selecting ligand in Phase A, and wild-type conventional and regulatory T cell numbers. These parameters are insensitive to the scaling constant derived from the proportion of  $\text{AND}$  TCR that are negatively selected in controls (see Text S1). The model's predictions do not depend on the temporal order of phase A and phase B, and so allow for TCR sensitivity to either increase or decrease with time during development.
