# Supplementary material for: Models of Self-Peptide Sampling by Developing T Cells Identify Candidate Mechanisms of Thymic Selection
Source: PLOS journal article supplement (doi:10.1371/journal.pcbi.1003102), 2013-07-25
Supplement: S5 (10.1371/journal.pcbi.1003102.s005) [file journal.pcbi.1003102.s005]

301 Moved Permanently

# Moved Permanently

The document has moved here.

---

Apache Server at www.ploscompbiol.org Port 80
